# Supplementary material for: Extraction of Viral Nucleic Acids with Carbon Nanotubes Increases SARS-CoV-2 RT-qPCR Detection Sensitivity
Source: bioRxiv or medRxiv preprint supplement (doi:10.1101/2021.01.22.20224675), 2021-01-26
Supplement: Supplementary file [file media-1.pdf]

# Extraction of Viral Nucleic Acids with Carbon

## Nanotubes Increases SARS-CoV-2 RT-qPCR

### Detection Sensitivity

*Sanghwa Jeong<sup>1</sup>, Eduardo G. Grandio<sup>1</sup>, Nicole Navarro<sup>2</sup>, Rebecca L. Pinals<sup>1</sup>, Francis Ledesma<sup>1</sup>, Darwin Yang<sup>1</sup>, and Markita P. Landry<sup>\*1,3-5</sup>*

<sup>1</sup>Department of Chemical and Biomolecular Engineering, University of California, Berkeley, California 94720, United States

<sup>2</sup>Department of Chemistry, University of California, Berkeley, California 94720, United States

<sup>3</sup>Innovative Genomics Institute (IGI), Berkeley, California 94720, United States

<sup>4</sup>California Institute for Quantitative Biosciences, QB3, University of California, Berkeley, California 94720, United States

<sup>5</sup>Chan-Zuckerberg Biohub, San Francisco, California 94158, United States

| Name     | Target Sequence in SARS-CoV-2       | Target Region in SARS-CoV-2 |
|----------|-------------------------------------|-----------------------------|
| Target1  | AAAAAAAAAAAAAAAAAAAAA (poly A tail) | 29861-29893                 |
| Target2  | GCUGCUGAGGCUUCAAG                   | 29024-29041                 |
| Target3  | UUACAAACAUUGGCCGCA                  | 29164-29181                 |
| Target4  | AAAUUCAAGAUCAAGU                    | 29304-29322                 |
| Target5  | ACUGUGACUCUUCUCCU                   | 29444-29461                 |
| Target6  | UUUUCGCUUUUCCGUUA                   | 29574-29591                 |
| Target7  | GAACUUCUCCUGCUAGAA                  | 28884-28901                 |
| Target8  | GUGCUACAACUCCUCAA                   | 28745-28762                 |
| Target9  | ACUACCUAGGAACUGGGC                  | 28605-28622                 |
| Target10 | UAAAUUCCUCGAGGACA                   | 28465-28482                 |

**Table S1.** Sequences targeted in the SARS-CoV-2 viral genome (variant MT007544.1) with 10 target DNA sequences. Base location in the genome for each target is shown. All the target sequences, except Target 1, aim to bind N gene region in the SARS-CoV-2 RNA genome.

|              |                    |                                             |
|--------------|--------------------|---------------------------------------------|
| SARSCoV-2_N1 | SARS-CoV-2_N1-F    | GAC CCC AAA ATC AGC GAA AT                  |
|              | SARS-CoV-2_N1-R    | TCT GGT TAC TGC CAG TTG AAT CTG             |
|              | SARS-CoV-2_N1Probe | FAM-ACC CCG CAT TAC GTT TGG TGG ACC<br>BHQ1 |

**Table S2.** Primer and probes used for RT-qPCR detection of SARS-CoV-2 viral RNA. All reagents come from the 2019-nCoV RUO Kit (Integrated DNA technologies).
